# Supplementary material
Source: ML conference proceedings conference paper supplement (https://openaccess.thecvf.com/content/CVPR2023/html/Ni_Conditional_Image-to-Video_Generation_CVPR_2023_paper.html)
Supplement: Supplementary file 2 [file Ni_Conditional_Image-to-Video_Generation_CVPR_2023_supplemental.zip]

Archive with 16 entries (16 files):
- 1-mug.mp4
- __MACOSX/._1-mug.mp4
- 2-mhad1.mp4
- __MACOSX/._2-mhad1.mp4
- 3-mhad2.mp4
- __MACOSX/._3-mhad2.mp4
- 4-natops.mp4
- __MACOSX/._4-natops.mp4
- 5-new_domain.mp4
- __MACOSX/._5-new_domain.mp4
- 6-mug_ddim.mp4
- __MACOSX/._6-mug_ddim.mp4
- 7-sota.mp4
- __MACOSX/._7-sota.mp4
- CVPR23_Image_to_Video_supp.pdf
- __MACOSX/._CVPR23_Image_to_Video_supp.pdf
